# Supplementary material for: In Vitro Antiviral Activity of Silydianin-Rich Extract from <em>Silybum marianum</em> Seeds Against Four Strains of Enteroviruses: EV71, Coxsackievirus B2, Coxsackievirus A10, and Poliovirus SL-1 and Its Impact on Improving Delayed Gastric Emptying in Mice
Source: Preprints.org preprint supplement (doi:10.20944/preprints202408.1600.v1), 2024-08-22
Supplement: Supplementary file 1 [file supplementary]

**In Vitro Antiviral Activity of Silydianin-Rich Extract from Silybum marianum Seeds Against Four Strains of Enteroviruses: EV71, Coxsackievirus B2, Coxsackievirus A10, and Poliovirus SL-1 and Its Impact on Improving Delayed Gastric Emptying in Mice**

Houda Zaher 1,2*, Sanae lemrabet 2, Neri Koutchala3 and Bouchaib Bencharki1

1Agri-Food and Health Laboratory (AFHL), Faculty of Sciences and Techniques, Hassan First University, Settat, Morocco.

zaherhouda@gmail.com; bouchaib.bencharki@uhp.ac.ma

2Virology Department, National Institute of Hygiene, Ministry of Health, Rabat, Morocco; [sanae.lem@gmail.com](mailto:sanae.lem@gmail.com)

3Department of Computer Science and Artificial Intelligence, Technical School of Computer Engineering and Telecommunications. University of Granada, Granada, Spain; e.nerik@go.ugr.es

*Correspondence should be addressed to Houda Zaher at: zaherhouda@gmail.com

**Supplementary Materials (appendix)**

**Figure S1.** The 1H NMR (600 MHz, DMSO-d6) analysis of the *Silybum marianum* (EtOAc) fraction revealed peaks corresponding to silydianin, the major compound in the extract and the traces of minor compounds that generally characterize isosilychristine A, isosilybine B and dehydrosilydianine.

**Figure S2.** The 13C NMR (151 MHz, DMSO-d6) analysis of the *Silybum marianum* (EtOAc) fraction revealed peaks corresponding to silydianin, the major compound in the extract.

**Figure S3.** The 13C DEPT analysis, this experiment differentiates between CH, CH2 and CH3 groups by variation of the selection angle parameter: the angle used is 135° angle gives all CH and CH3 in a phase opposite to CH2.

**Figure S4.** The ¹H NMR (600 MHz, DMSO-d₆) analysis of the n-BuOH fraction of *Silybum marianum* predominantly revealed peaks corresponding to sugars.

**Figure S5.** The ¹H NMR (600 MHz, DMSO-d₆) analysis of the (CHCl₃) fraction of *Silybum marianum* predominantly revealed peaks corresponding to silydianin.

**
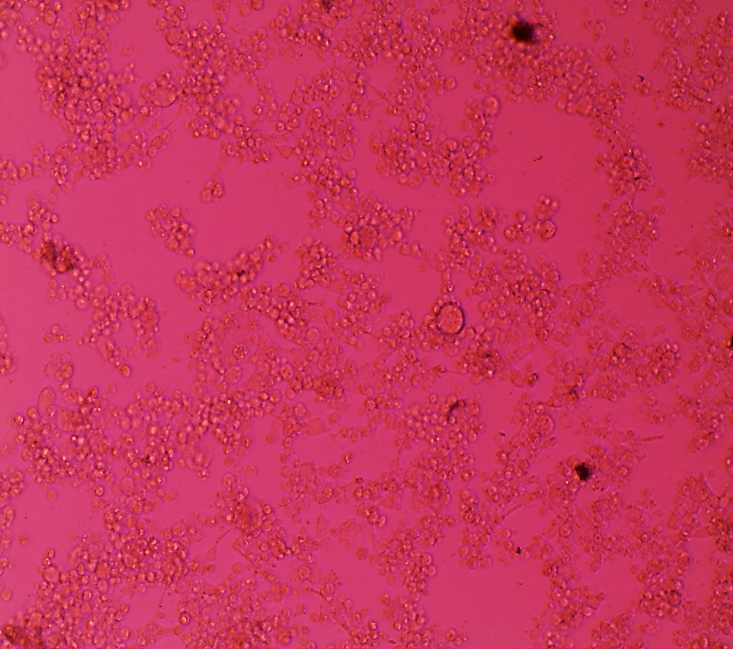
a.**Virus control **b**. Cell control

**
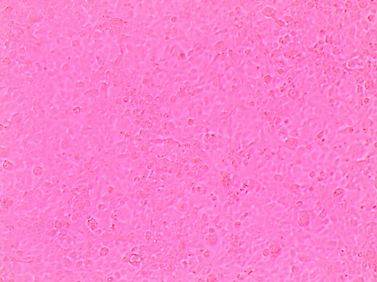
**

**
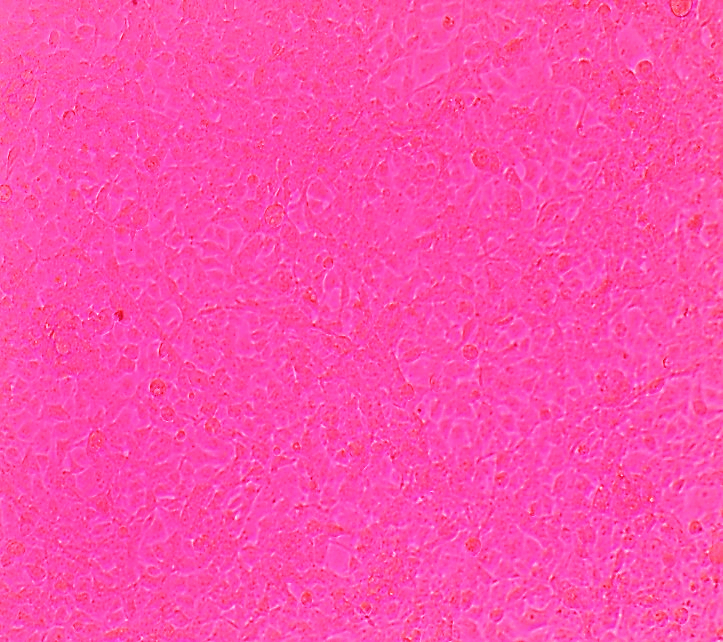

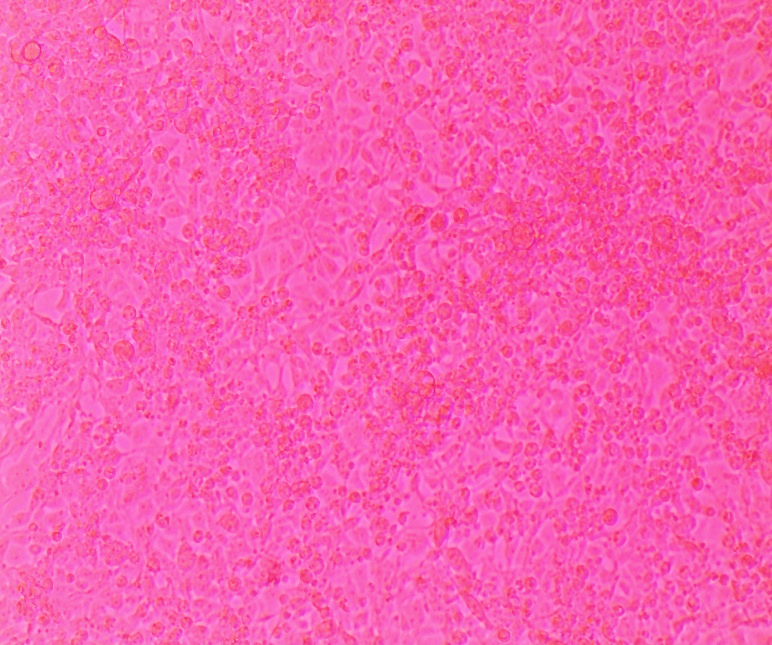
 c.** Treatment with 400 µg /mL  **d.** Treatment with 200 µg /mL

**
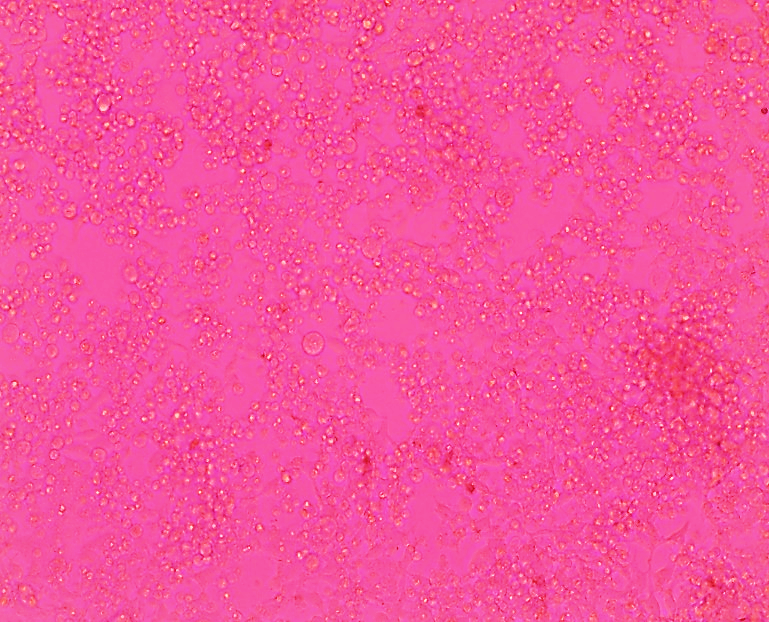

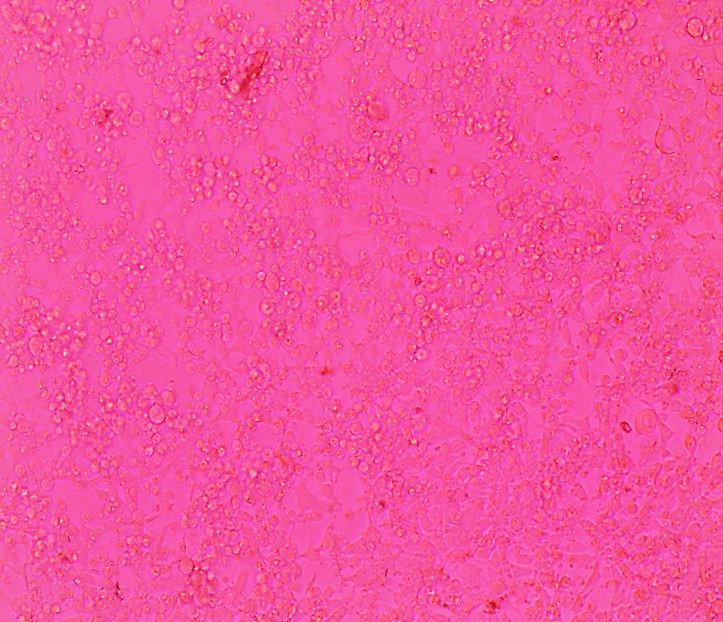
 e.** Treatment with 100 µg/mL **f.** Treatment with 50 µg /mL

**Figure S6.** The monolayers were microscopically examined for viral cytopathic effects (CPE) in a dose-dependent manner, focusing on cell rounding and other significant morphological changes compared to control cells after a 24 ± 2-hour incubation with the treatment concentrations, prior to performing the neutral red assay.

**
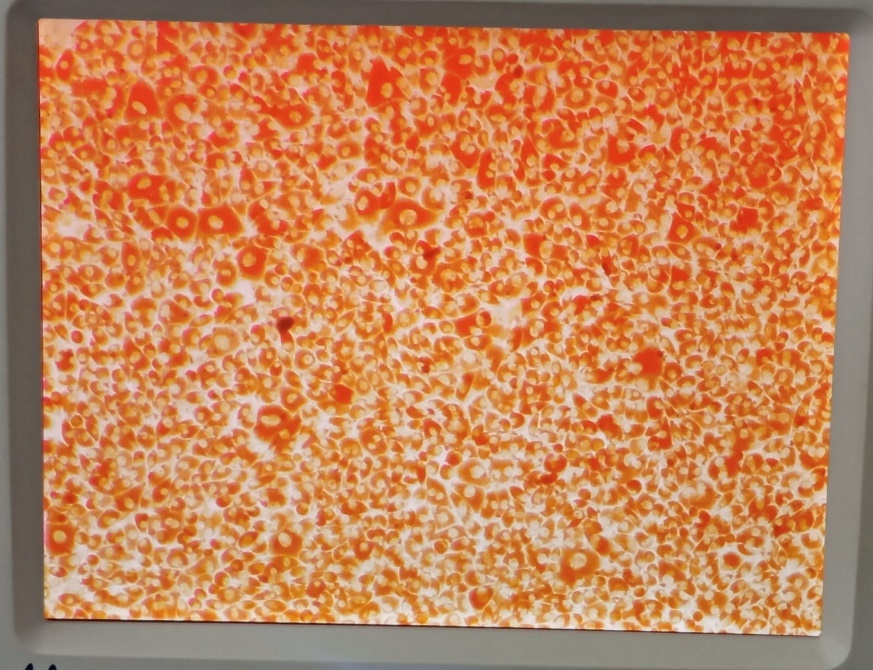

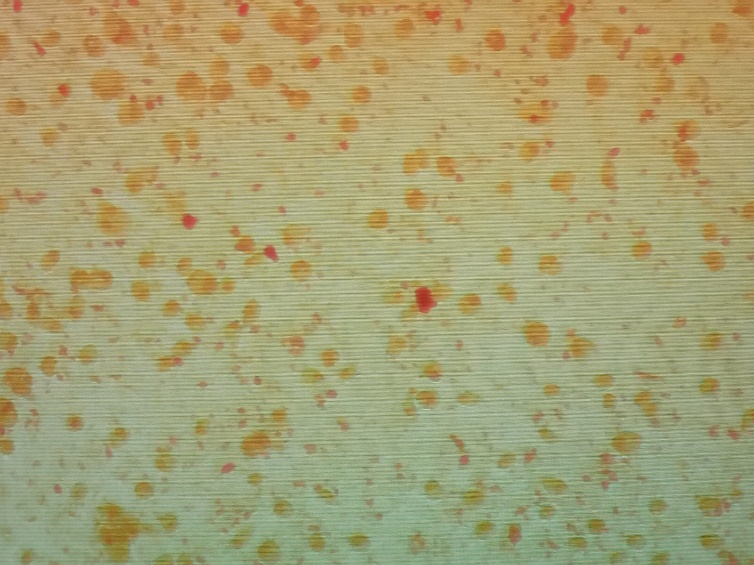
**

**(a) (b)**


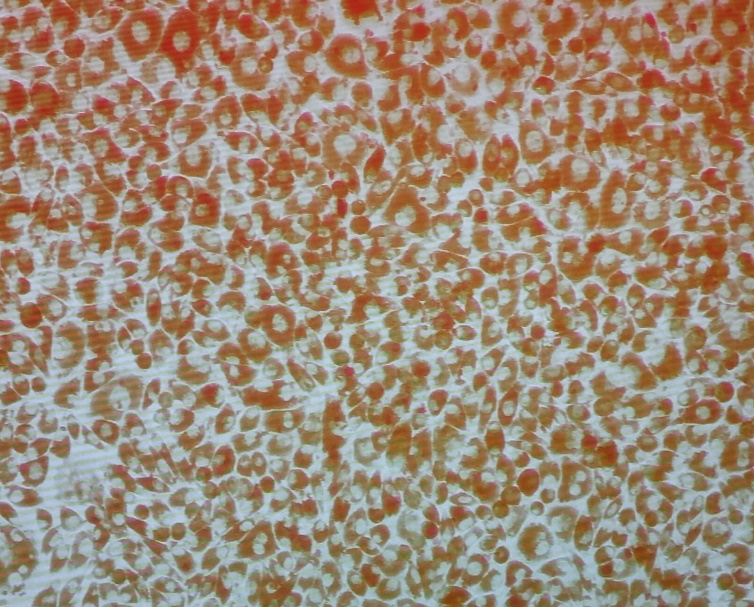
**
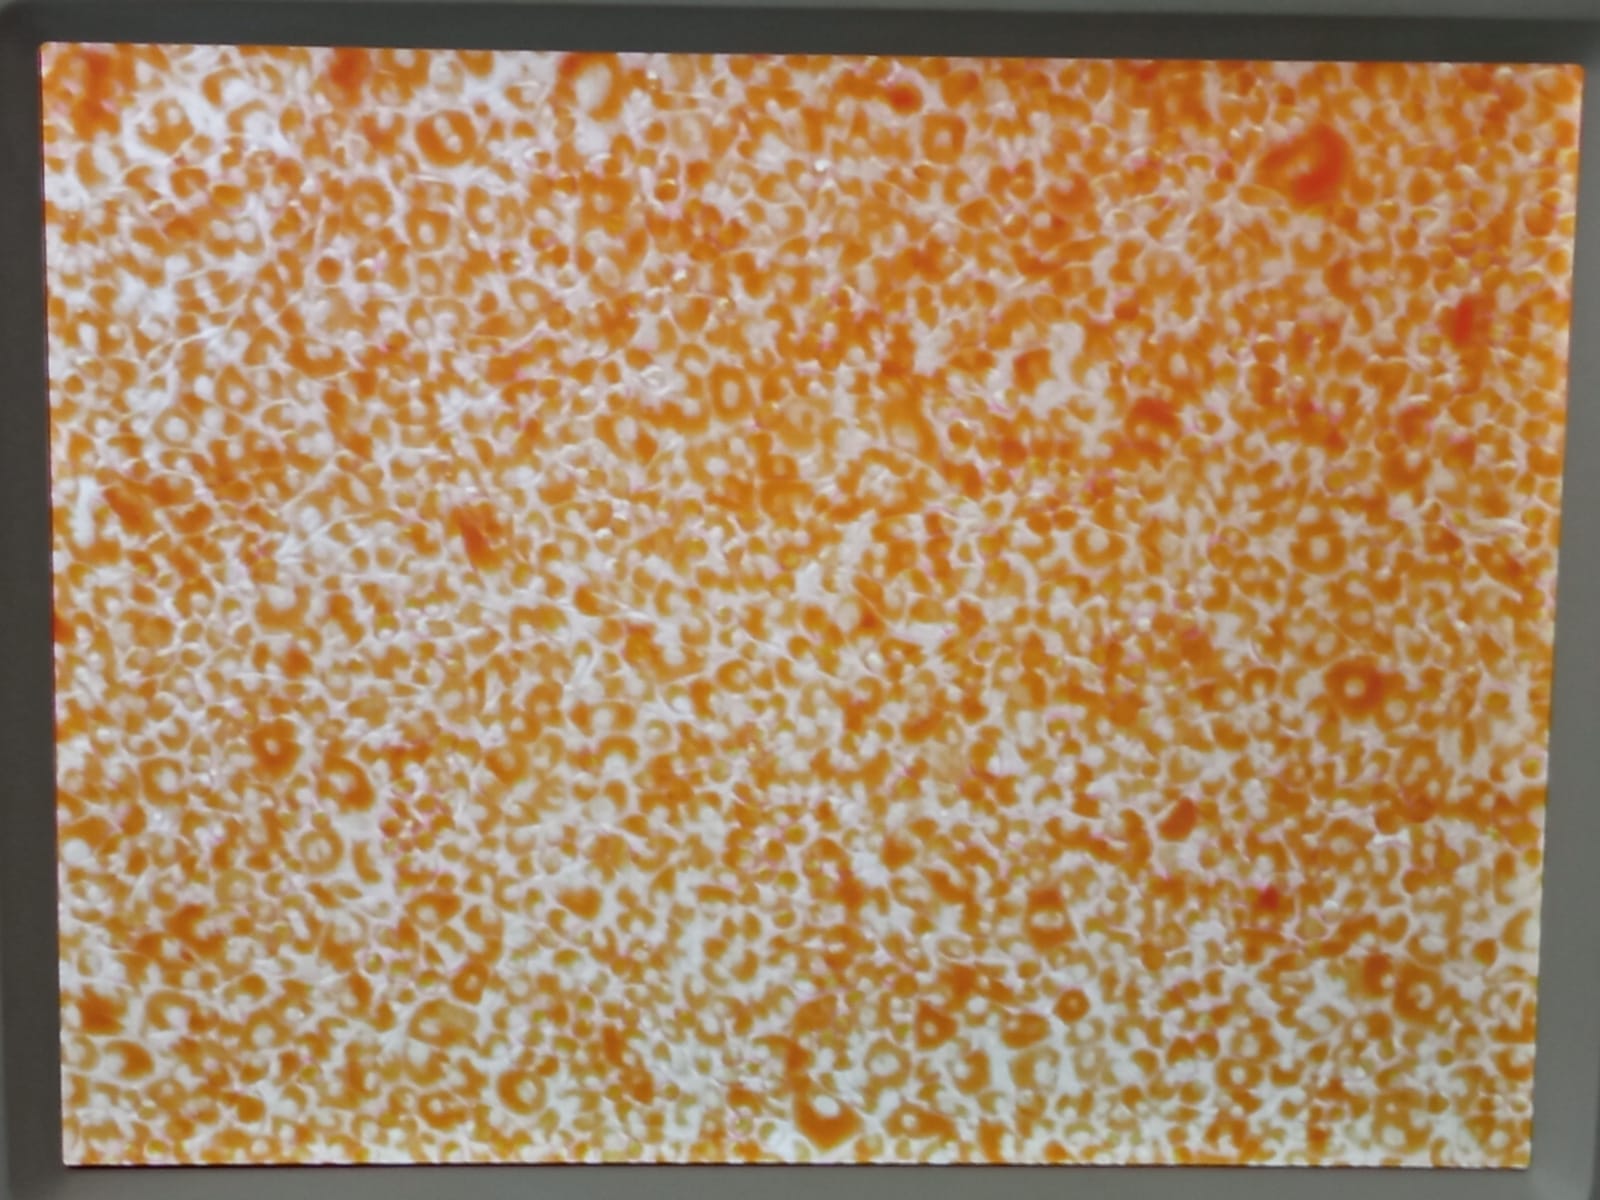
(c) (d)**

**(e) (f)**

**
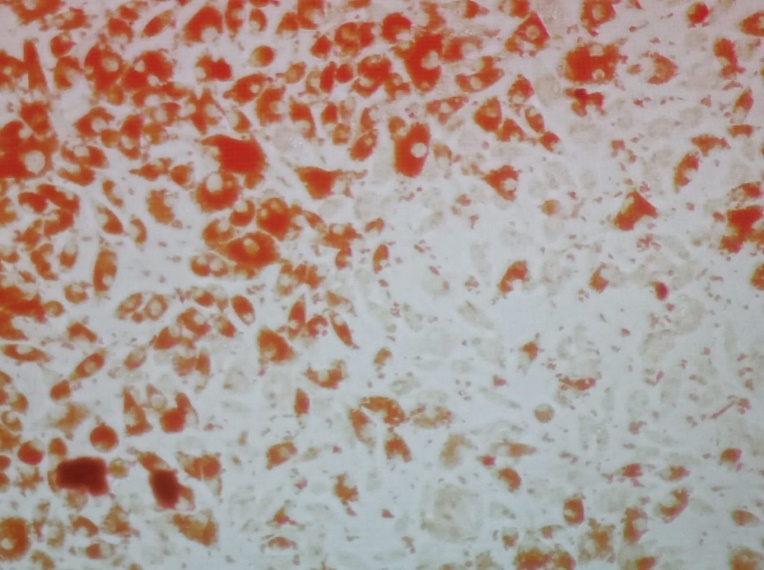

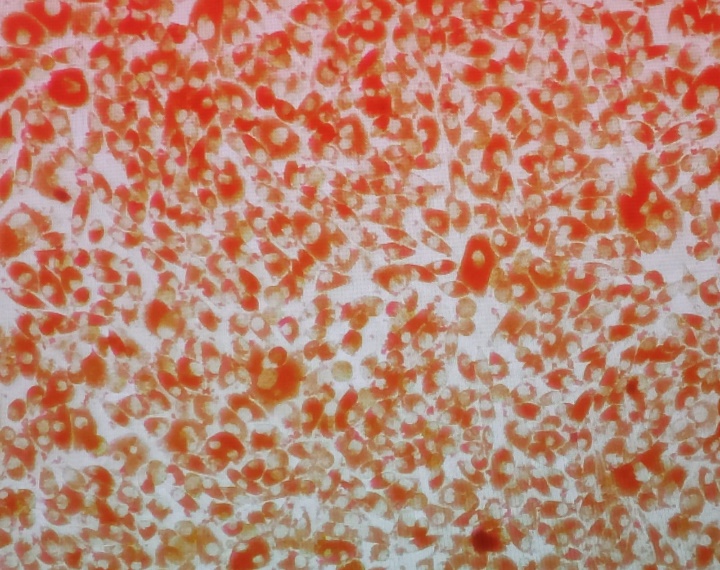
**

**Figure S7.** Cell viability stained by neutral red following the neutral red method (as detailed in the Methods section) after 24 hours of incubation with virus and treatment concentrations: (a) virus control, (b) cell control, (c) treatment with 400 µg/mL, (d) 200 µg/mL, (e) 100 µg/mL, (f) 50 µg/mL.
